# Supplementary material for: Novel, provable algorithms for efficient ensemble-based computational protein design and their application to the redesign of the c-Raf-RBD:KRas protein-protein interface
Source: PubMed Central journal article supplement (PMC7329130; doi:10.1371/journal.pcbi.1007447), 2020-06-08
Supplement: pcbi.1007447.s004.pdf [file pcbi.1007447.s004.pdf]

## Novel, provable algorithms for efficient ensemble-based computational protein design and their application to the redesign of the c-Raf-RBD:KRas protein-protein interface (Supporting information)

Anna U. Lowegard<sup>†</sup>, Marcel S. Frenkel<sup>†</sup>, Graham T. Holt, Jonathan D. Jou, Adegoke A. Ojewole, and Bruce R. Donald

<sup>†</sup> These authors contributed equally to the work.

### **S4 Text. Sequence and partition function approximation algorithms.**

$K^*$  is a partition function approximation algorithm that approximates a single partition function  $q_{pl}$ ,  $q_p$ , or  $q_l$  for a single sequence [1–3]. Historically we have overloaded the term  $K^*$  to refer to both the partition function approximation algorithm and the ratio of partition functions:  $q_{pl}/q_p q_l$ . The  $BBK^*$  algorithm implements a search strategy over sequence space to find the best sequences ranked by this score. In doing so,  $BBK^*$  calls the  $K^*$  partition function approximation algorithm as a subroutine. In contrast, in the new work herein,  $EWAK^*$  is designed as a replacement for the  $K^*$  partition function approximation algorithm. Therefore, we compared  $BBK^*$  with  $K^*$  to  $BBK^*$  with  $EWAK^*$  for testing purposes.

FRIES is effectively a preprocessing algorithm that is agnostic to the method of partition function calculation, and therefore is run before  $BBK^*$ .

## References

- [1] R. H. Lilien, B. W. Stevens, A. C. Anderson, and B. R. Donald. A novel ensemble-based scoring and search algorithm for protein redesign and its application to modify the substrate specificity of the gramicidin synthetase a phenylalanine adenylation enzyme. *J Comput Biol*, 12(6):740–61, 2005. DOI: 10.1089/cmb.2005.12.740.
- [2] I. Georgiev, R. H. Lilien, and B. R. Donald. The minimized dead-end elimination criterion and its application to protein redesign in a hybrid scoring and search algorithm for computing partition functions over molecular ensembles. *J Comput Chem*, 29(10):1527–42, 2008. DOI: 10.1002/jcc.20909.
- [3] K. E. Roberts, P. R. Cushing, P. Boisguerin, D. R. Madden, and B. R. Donald. Computational design of a PDZ domain peptide inhibitor that rescues CFTR activity. *PLoS Comput Biol*, 8(4):e1002477, 2012. DOI: 10.1371/journal.pcbi.1002477.
