# Supplementary material for: Novel, provable algorithms for efficient ensemble-based computational protein design and their application to the redesign of the c-Raf-RBD:KRas protein-protein interface
Source: PubMed Central journal article supplement (PMC7329130; doi:10.1371/journal.pcbi.1007447), 2020-06-08
Supplement: pcbi.1007447.s006.pdf [file pcbi.1007447.s006.pdf]

**Novel, provable algorithms for efficient ensemble-based computational protein design and their application to the redesign of the c-Raf-RBD:KRas protein-protein interface (Supporting information)**

Anna U. Lowegard<sup>†</sup>, Marcel S. Frenkel<sup>†</sup>, Graham T. Holt, Jonathan D. Jou, Adegoke A. Ojewole, and Bruce R. Donald

<sup>†</sup> These authors contributed equally to the work.

**S1 Table. Protein structures used in computational experiments as described in the Section entitled “Computational experiments.”**

Each protein structure has its PDB ID listed along with its molecule names as presented in the Protein Database entry for each structure. Individual designs are not listed or described here, but the necessary code and data is provided for the interested reader (see “Data availability statement”).

| PDB ID | Molecule(s)                                                                                                                     |
|--------|---------------------------------------------------------------------------------------------------------------------------------|
| 2RL0   | Fibronectin and Fibronectin-binding protein                                                                                     |
| 4WEM   | K88 fimbrial protein AC and Anti-F4+ETEC bacteria VHH variable region                                                           |
| 2P4A   | Ribonuclease pancreatic and ANTIBODY CAB-RN05                                                                                   |
| 2RFE   | Epidermal growth factor receptor and ERBB receptor feedback inhibitor 1                                                         |
| 2RF9   | Epidermal growth factor receptor and ERBB receptor feedback inhibitor 1                                                         |
| 4WWI   | Immunoglobulin G-binding protein A and Ig gamma-3 chain C region                                                                |
| 4ZNC   | Immunoglobulin G-binding protein A and Ig gamma-3 chain C region                                                                |
| 3U7Y   | NIH45-46 heavy chain, Ig gamma-1 chain C region, Envelope glycoprotein gp160, and NIH45-46 light chain, Ig kappa chain C region |
| 2HNV   | Oxytocin-neurophysin 1                                                                                                          |
| 4Z80   | EGF family domain-containing protein and Cytoadherence-linked asexual protein                                                   |
| 4U3S   | Cellulosomal scaffoldin adaptor protein B and Cellulosomal scaffoldin                                                           |
| 1B6C   | FK506-BINDING PROTEIN and TGF-B SUPERFAMILY RECEPTOR TYPE I                                                                     |
| 3GXC   | Ephrin type-A receptor 4 and Ephrin-B2                                                                                          |
| 1GWC   | GLUTATHIONE S-TRANSFERASE TSI-1                                                                                                 |
| 4WYU   | Protein scribble homolog and peptide SER-TRP-PHE-GLN-THR-ASP-LEU                                                                |
| 5IT3   | Lysine-specific histone demethylase 1A                                                                                          |
| 2HNU   | Oxytocin-neurophysin 1                                                                                                          |
| 5D68   | Krev interaction trapped protein 1                                                                                              |
| 5A6Y   | FUCOSE-BINDING LECTIN PA-IIL                                                                                                    |
| 3K3Q   | Llama Aa1 VHH domain and Botulinum neurotoxin type A                                                                            |
| 3CAL   | Fibronectin and peptide from Fibronectin-binding protein A                                                                      |
| 1A0R   | TRANSDUCIN (BETA SUBUNIT), TRANSDUCIN (GAMMA SUBUNIT), and PHOSDUCIN                                                            |
| 5EM2   | Ribosome biogenesis protein ERB1 and Ribosome biogenesis protein YTM1                                                           |
| 4PXF   | Rhodopsin and S-arrestin                                                                                                        |
| 3EB6   | Baculoviral IAP repeat-containing protein 3 and Ubiquitin-conjugating enzyme E2 D2                                              |
| 3BU8   | Telomeric repeat-binding factor 2 and TERF1-interacting nuclear factor 2                                                        |
| 5DC0   | Fibronectin and Tyrosine-protein kinase ABL1                                                                                    |
| 2Q1E   | Amyloidogenic immunoglobulin light chain protein AL-09                                                                          |
| 2XXM   | CAPSID PROTEIN P24, CAMELID VHH 9, and INHIBITOR OF CAPSID ASSEMBLY                                                             |
| 2Q2A   | ArtJ                                                                                                                            |
| 2RFD   | Epidermal growth factor receptor and ERBB receptor feedback inhibitor 1                                                         |
| 5DC4   | Tyrosine-protein kinase ABL1 and AS25 monoclonal antibody                                                                       |
| 2XGY   | RELIK CAPSID N-TERMINAL DOMAIN and PEPTIDYL-PROLYL CIS-TRANS ISOMERASE A                                                        |
| 2P49   | Ribonuclease pancreatic and ANTIBODY CAB-RN05                                                                                   |
| 3RJQ   | C186 gp120 and Llama VHH A12                                                                                                    |
