# Supplementary material for: Novel, provable algorithms for efficient ensemble-based computational protein design and their application to the redesign of the c-Raf-RBD:KRas protein-protein interface
Source: PubMed Central journal article supplement (PMC7329130; doi:10.1371/journal.pcbi.1007447), 2020-06-08
Supplement: pcbi.1007447.s007.pdf [file pcbi.1007447.s007.pdf]

**Novel, provable algorithms for efficient ensemble-based computational protein design and their application to the redesign of the c-Raf-RBD:KRas protein-protein interface (Supporting information)**

Anna U. Lowegard<sup>†</sup>, Marcel S. Frenkel<sup>†</sup>, Graham T. Holt, Jonathan D. Jou, Adegoke A. Ojewole, and Bruce R. Donald

<sup>†</sup> These authors contributed equally to the work.

**S2 Table. Experimental and computational percent change in binding and rankings.**

For each listed c-Raf-RBD variant, we give the experimental percent change in KRas binding relative to wild-type c-Raf-RBD as reported in [1] (no  $K_a$  values were reported in [1] so the corresponding entries are left blank here) and as calculated from reported binding values in [2] and [3] (reported here as Exp.  $K_d$ ), the EWAK\* computationally predicted percent change in binding, the  $\Delta b$  values as described in the Section entitled “FRIES/EWAK\* retrospectively predicted the affect mutations in c-Raf-RBD have on binding to KRas,” and the rankings that correspond to these values. The  $\Delta b$  values are calculated as follows:  $\log_{10}(\%) - 2$  where % represents the percent change in binding upon mutation. The rankings have a Pearson correlation of 0.81. The Pearson correlation between the change in binding values  $\Delta b$  is 0.64.

| Mutation(s)                   | Exp. $K_d(\mu M)$ | Exp. (%)             | $\Delta b$ (Exp.) | Comp. (%)              | $\Delta b$ (Comp.) | Exp. Ranking | Comp. Ranking |
|-------------------------------|-------------------|----------------------|-------------------|------------------------|--------------------|--------------|---------------|
| Wild-Type                     | 0.13              | 100.00               | 0.00              | 100.00                 | 0.00               | N/A          | N/A           |
| R89L                          |                   | $1.3 \times 10^{-7}$ | -8.89             | $1.64 \times 10^{-10}$ | -11.79             | 1            | 3             |
| F61W/R67L/V69E/N71R/V88I/A85K | 57.0              | 0.23                 | -2.64             | $2.20 \times 10^{-11}$ | -12.66             | 2            | 2             |
| K84A                          | 14.0              | 0.93                 | -2.03             | $3.03 \times 10^{-5}$  | -6.52              | 3            | 4             |
| Q66A                          | 7.40              | 1.76                 | -1.75             | 0.99                   | -2.00              | 4            | 16            |
| A85D                          |                   | 3.00                 | -1.52             | 0.01                   | -4.00              | 5            | 10            |
| R59A                          | 3.80              | 3.42                 | -1.47             | $8.09 \times 10^{-4}$  | -5.09              | 6            | 7             |
| F61W/V69E/N71R/V88I           | 2.80              | 4.64                 | -1.33             | 0.03                   | -3.56              | 7            | 12            |
| R67A                          | 2.10              | 6.19                 | -1.21             | $1.78 \times 10^{-4}$  | -5.75              | 8            | 6             |
| K84L                          |                   | 8.60                 | -1.07             | $1.56 \times 10^{-4}$  | -5.81              | 9            | 5             |
| Q66K                          |                   | 9.00                 | -1.05             | 1.78                   | -1.75              | 10           | 18            |
| T68A                          | 1.30              | 10.00                | -1.00             | 4.03                   | -1.39              | 11           | 20            |
| V88D                          |                   | 10.00                | -1.00             | 0.05                   | -3.34              | 12           | 13            |
| T68K                          |                   | 11.00                | -0.96             | $5.63 \times 10^{-17}$ | -18.3              | 13           | 1             |
| V69A                          | 0.95              | 13.68                | -0.86             | 5.08                   | -1.29              | 14           | 22            |
| A85I                          |                   | 18.00                | -0.74             | 8.64                   | -1.06              | 15           | 24            |
| K65A                          | 0.70              | 18.57                | -0.73             | 1.04                   | -1.98              | 16           | 17            |
| K65E                          | 0.67              | 19.40                | -0.71             | 0.71                   | -2.15              | 17           | 15            |
| N64A                          | 0.61              | 21.31                | -0.67             | 5.77                   | -1.24              | 18           | 23            |
| V69R                          |                   | 29.00                | -0.54             | $1.40 \times 10^4$     | 2.15               | 19           | 34            |
| K87Q                          |                   | 30.00                | -0.52             | 12.43                  | -0.91              | 20           | 26            |
| K65M                          | 0.41              | 31.71                | -0.50             | 2.53                   | -1.60              | 21           | 19            |
| N71E                          |                   | 34.00                | -0.47             | 0.15                   | -2.84              | 22           | 14            |
| F61W                          | 0.36              | 36.11                | -0.44             | 116.20                 | 0.07               | 23           | 29            |
| F61W/R67L/N71R/V88I           | 0.36              | 36.11                | -0.44             | 0.01                   | -3.97              | 24           | 11            |
| V88I                          | 0.33              | 39.39                | -0.40             | 16.15                  | -0.79              | 25           | 28            |
| R67L                          |                   | 42.00                | -0.38             | $3.06 \times 10^{-3}$  | -4.51              | 26           | 9             |
| R59L                          |                   | 43.00                | -0.37             | $2.51 \times 10^{-3}$  | -4.60              | 27           | 8             |
| K84R                          |                   | 49.00                | -0.31             | 10.01                  | -1.00              | 28           | 25            |
| N64D                          |                   | 50.00                | -0.30             | 15.60                  | -0.81              | 29           | 27            |
| F61W/N71R/V88I                | 0.24              | 54.17                | -0.27             | $1.96 \times 10^4$     | 2.29               | 30           | 35            |
| K87R                          |                   | 100.00               | 0.00              | 120.04                 | 0.08               | 31           | 30            |
| F61W/N71R                     | 0.08              | 162.50               | 0.21              | $1.10 \times 10^5$     | 3.04               | 32           | 37            |
| V88K                          |                   | 171.00               | 0.23              | 127.37                 | 0.11               | 33           | 31            |
| V88H                          |                   | 266.00               | 0.42              | 227.92                 | 0.36               | 34           | 32            |
| A85R                          |                   | 290.00               | 0.46              | $1.50 \times 10^7$     | 5.17               | 35           | 39            |
| N71R                          | 0.04              | 325.00               | 0.51              | $9.97 \times 10^4$     | 3.00               | 36           | 36            |
| N64K                          |                   | 380.00               | 0.58              | 4.47                   | -1.35              | 37           | 21            |
| V88R                          |                   | 400.00               | 0.60              | $2.44 \times 10^3$     | 1.39               | 38           | 33            |
| A85K/V88R                     |                   | 550.00               | 0.74              | $1.33 \times 10^7$     | 5.12               | 39           | 38            |
| A85K                          |                   | 700.00               | 0.85              | $2.13 \times 10^7$     | 5.33               | 40           | 40            |
| N71R/A85K                     | 0.015             | 866.67               | 0.94              | $3.63 \times 10^9$     | 7.56               | 41           | 41            |

## References

- [1] M. Fridman, H. Maruta, J. Gonez, F. Walker, H. Treutlein, J. Zeng, and A. Burgess. Point mutants of c-raf-1 RBD with elevated binding to v-Ha-Ras. *Journal of Biological Chemistry*, 275(39):30363–30371, 2000.
- [2] C. Block, R. Janknecht, C. Herrmann, N. Nassar, and A. Wittinghofer. Quantitative structure-activity analysis correlating Ras/Raf interaction in vitro to Raf activation in vivo. *Nature structural biology*, 3(3):244, 1996.
- [3] D. Filchtinski, O. Sharabi, A. Ruppel, I. R. Vetter, C. Herrmann, and J. M. Shifman. What makes Ras an efficient molecular switch: a computational, biophysical, and structural study of Ras-GDP interactions with mutants of Raf. *Journal of molecular biology*, 399(3):422–435, 2010.
