# Supplementary material for: Novel, provable algorithms for efficient ensemble-based computational protein design and their application to the redesign of the c-Raf-RBD:KRas protein-protein interface
Source: PubMed Central journal article supplement (PMC7329130; doi:10.1371/journal.pcbi.1007447), 2020-06-08
Supplement: pcbi.1007447.s008.pdf [file pcbi.1007447.s008.pdf]

## Novel, provable algorithms for efficient ensemble-based computational protein design and their application to the redesign of the c-Raf-RBD:KRas protein-protein interface (Supporting information)

Anna U. Lowegard<sup>†</sup>, Marcel S. Frenkel<sup>†</sup>, Graham T. Holt, Jonathan D. Jou, Adegoke A. Ojewole, and Bruce R. Donald

<sup>†</sup> These authors contributed equally to the work.

### S3 Table. Table of computational predictions for point mutants in c-Raf-RBD.

Each section of the table shows the results of the redesign of a residue position in c-Raf-RBD in the c-Raf-RBD:KRas PPI in order of increasing upper bound on  $\log(K^*)$ . The table contains the values for upper and lower bounds on  $\log(K^*)$  values (these bounds are described in detail in [1]).

\*Design results for the wild-type amino acid identity for each position.

<sup>†</sup>Mutations that were selected for experimental testing and validation.

| Mutation          | Lower Bound $\log(K^*)$ | Upper Bound $\log(K^*)$ |
|-------------------|-------------------------|-------------------------|
| T57E              | 1.47                    | 1.50                    |
| T57D              | 2.05                    | 2.07                    |
| T57G              | 3.34                    | 3.35                    |
| T57Q              | 3.38                    | 3.42                    |
| T57M <sup>†</sup> | 3.43                    | 3.46                    |
| T57A              | 3.47                    | 3.48                    |
| T57S              | 3.45                    | 3.53                    |
| T57F              | 3.61                    | 3.63                    |
| T57C              | 3.63                    | 3.66                    |
| T57Y              | 3.60                    | 3.66                    |
| T57L              | 3.68                    | 3.71                    |
| T57N              | 3.71                    | 3.77                    |
| T57Hid            | 3.72                    | 3.81                    |
| T57V              | 3.78                    | 3.81                    |
| T57I              | 3.86                    | 3.90                    |
| T57*              | 3.82                    | 3.92                    |
| T57W              | 3.97                    | 4.02                    |
| T57Hie            | 4.22                    | 4.26                    |
| T57K <sup>†</sup> | 5.01                    | 5.07                    |
| T57R              | 5.03                    | 5.12                    |
| T57Hip            | 5.62                    | 5.70                    |
| R59D              | 9.48                    | 9.74                    |
| R59E              | 10.30                   | 10.64                   |
| R59G              | 12.94                   | 13.03                   |
| R59A              | 12.96                   | 13.06                   |
| R59N              | 12.88                   | 13.10                   |

|        |       |       |
|--------|-------|-------|
| R59V   | 13.01 | 13.11 |
| R59C   | 12.96 | 13.14 |
| R59S   | 12.88 | 13.15 |
| R59F   | 12.96 | 13.15 |
| R59Y   | 12.99 | 13.18 |
| R59T   | 12.96 | 13.25 |
| R59I   | 13.06 | 13.29 |
| R59Hid | 13.03 | 13.35 |
| R59L   | 13.42 | 13.58 |
| R59M   | 13.28 | 13.68 |
| R59Q   | 13.55 | 13.74 |
| R59W   | 13.93 | 14.04 |
| R59Hie | 13.88 | 14.25 |
| R59Hip | 15.86 | 16.21 |
| R59K   | 16.02 | 16.58 |
| R59*   | 17.85 | 18.30 |
| K65T   | 6.94  | 7.91  |
| K65G   | 8.46  | 8.89  |
| K65D   | 8.47  | 9.08  |
| K65A   | 8.73  | 9.10  |
| K65E   | 8.56  | 9.11  |
| K65L   | 8.91  | 9.38  |
| K65S   | 8.79  | 9.38  |
| K65I   | 9.13  | 9.52  |
| K65N   | 9.06  | 9.55  |
| K65C   | 9.05  | 9.57  |
| K65Q   | 9.04  | 9.57  |
| K65F   | 9.06  | 9.68  |
| K65M   | 9.09  | 9.70  |
| K65Y   | 9.10  | 9.77  |
| K65Hip | 9.40  | 9.88  |
| K65W   | 9.21  | 9.90  |
| K65Hid | 9.36  | 9.92  |
| K65Hie | 9.42  | 10.02 |
| K65R   | 10.46 | 11.31 |
| K65*   | 10.62 | 11.48 |
| Q66Hie | 2.76  | 2.82  |
| Q66Hip | 3.17  | 3.23  |
| Q66L   | 7.17  | 7.25  |
| Q66E   | 7.93  | 7.95  |
| Q66Hid | 8.64  | 8.71  |
| Q66D   | 11.37 | 11.42 |

|        |        |        |
|--------|--------|--------|
| Q66A   | 11.44  | 11.48  |
| Q66G   | 11.02  | 11.57  |
| Q66S   | 11.59  | 11.71  |
| Q66K   | 11.63  | 11.81  |
| Q66N   | 11.79  | 11.85  |
| Q66R   | 11.87  | 11.96  |
| Q66C   | 12.43  | 12.47  |
| Q66T   | 12.39  | 12.48  |
| Q66M   | 12.65  | 12.73  |
| Q66*   | 13.43  | 13.49  |
| R67Y   | 7.88   | 8.43   |
| R67E   | 8.58   | 9.11   |
| R67D   | 8.44   | 9.21   |
| R67W   | 9.28   | 9.62   |
| R67F   | 10.74  | 11.14  |
| R67Hie | 11.62  | 12.31  |
| R67G   | 12.14  | 12.39  |
| R67A   | 12.37  | 12.61  |
| R67S   | 12.33  | 12.98  |
| R67Hid | 12.59  | 13.19  |
| R67C   | 12.85  | 13.20  |
| R67T   | 12.73  | 13.21  |
| R67Q   | 12.82  | 13.32  |
| R67N   | 12.64  | 13.33  |
| R67V   | 13.12  | 13.46  |
| R67M   | 12.83  | 13.51  |
| R67L   | 13.63  | 13.91  |
| R67I   | 13.59  | 14.10  |
| R67Hip | 14.99  | 15.62  |
| R67K   | 16.92  | 17.61  |
| R67*   | 17.94  | 18.59  |
| T68Q   | -12.00 | -11.60 |
| T68R   | -8.92  | -8.34  |
| T68E   | -2.55  | -2.23  |
| T68K   | -2.20  | -1.80  |
| T68M   | -0.92  | -0.62  |
| T68I   | 2.82   | 2.91   |
| T68Hid | 4.01   | 4.21   |
| T68Hie | 6.16   | 6.38   |
| T68D   | 6.54   | 6.74   |
| T68Hip | 7.04   | 7.23   |
| T68V   | 10.03  | 10.10  |

|        |        |        |
|--------|--------|--------|
| T68N   | 11.61  | 11.94  |
| T68G   | 14.43  | 14.46  |
| T68A   | 14.75  | 14.79  |
| T68C   | 14.84  | 14.95  |
| T68S   | 14.91  | 15.17  |
| T68*   | 16.04  | 16.21  |
| V69Y   | -20.72 | -18.18 |
| V69W   | -3.45  | -1.01  |
| V69F   | -0.74  | 1.54   |
| V69Hie | 17.19  | 19.15  |
| V69E   | 18.66  | 19.83  |
| V69Hid | 18.00  | 19.84  |
| V69L   | 19.83  | 21.10  |
| V69D   | 19.91  | 21.16  |
| V69G   | 21.61  | 22.33  |
| V69A   | 22.34  | 23.03  |
| V69I   | 22.03  | 23.10  |
| V69Hip | 21.19  | 23.32  |
| V69S   | 22.33  | 23.37  |
| V69N   | 22.27  | 23.43  |
| V69C   | 22.79  | 23.61  |
| V69T   | 22.76  | 23.70  |
| V69Q   | 22.85  | 23.89  |
| V69*   | 23.67  | 24.30  |
| V69M   | 23.30  | 24.48  |
| V69K   | 24.95  | 26.48  |
| V69R   | 25.56  | 27.16  |
| N71E   | 4.31   | 4.71   |
| N71D   | 5.70   | 5.95   |
| N71G   | 6.86   | 6.96   |
| N71A   | 7.00   | 7.11   |
| N71S   | 7.02   | 7.22   |
| N71I   | 6.91   | 7.26   |
| N71C   | 7.14   | 7.30   |
| N71Hid | 7.05   | 7.32   |
| N71T   | 7.18   | 7.46   |
| N71*   | 7.25   | 7.49   |
| N71V   | 7.43   | 7.60   |
| N71Hie | 7.28   | 7.63   |
| N71F   | 7.41   | 7.64   |
| N71W   | 7.52   | 7.71   |
| N71Q   | 7.33   | 7.72   |

|                   |       |       |
|-------------------|-------|-------|
| N71L              | 7.62  | 7.74  |
| N71M              | 7.63  | 7.96  |
| N71Y              | 7.99  | 8.22  |
| N71K              | 9.05  | 9.55  |
| N71Hip            | 9.23  | 9.59  |
| N71R <sup>†</sup> | 9.66  | 10.10 |
| R73E              | 3.49  | 3.58  |
| R73D              | 3.75  | 3.81  |
| R73A              | 4.66  | 4.68  |
| R73G              | 4.65  | 4.68  |
| R73T              | 4.62  | 4.69  |
| R73V              | 4.67  | 4.70  |
| R73C              | 4.66  | 4.71  |
| R73I              | 4.66  | 4.72  |
| R73Hid            | 4.66  | 4.73  |
| R73S              | 4.64  | 4.73  |
| R73L              | 4.66  | 4.73  |
| R73Q              | 4.66  | 4.75  |
| R73M              | 4.66  | 4.75  |
| R73N              | 4.69  | 4.77  |
| R73F              | 4.74  | 4.80  |
| R73Y              | 4.75  | 4.81  |
| R73Hie            | 4.80  | 4.87  |
| R73W              | 4.90  | 4.98  |
| R73Hip            | 5.93  | 6.01  |
| R73K              | 5.90  | 6.04  |
| R73 <sup>*</sup>  | 7.99  | 8.09  |
| K84D              | 7.60  | 7.71  |
| K84E              | 8.03  | 8.22  |
| K84G              | 10.42 | 10.47 |
| K84A              | 10.45 | 10.53 |
| K84S              | 10.53 | 10.73 |
| K84V              | 10.69 | 10.75 |
| K84T              | 10.64 | 10.82 |
| K84I              | 10.73 | 10.85 |
| K84C              | 10.76 | 10.88 |
| K84N              | 10.94 | 11.09 |
| K84Y              | 10.91 | 11.15 |
| K84L              | 11.16 | 11.29 |
| K84Q              | 11.18 | 11.37 |
| K84Hie            | 11.34 | 11.50 |
| K84M              | 11.27 | 11.51 |

|                   |       |       |
|-------------------|-------|-------|
| K84Hid            | 11.50 | 11.69 |
| K84F              | 12.14 | 12.25 |
| K84W              | 12.23 | 12.38 |
| K84Hip            | 14.46 | 14.62 |
| K84R              | 15.94 | 16.31 |
| K84*              | 16.92 | 17.19 |
| A85W              | 9.32  | 9.98  |
| A85E              | 18.70 | 19.59 |
| A85D              | 21.78 | 23.25 |
| A85F              | 24.92 | 25.27 |
| A85Q              | 24.66 | 25.85 |
| A85Hie            | 25.56 | 26.48 |
| A85Y              | 25.36 | 26.61 |
| A85C              | 25.82 | 26.68 |
| A85N              | 25.84 | 26.67 |
| A85*              | 26.29 | 26.85 |
| A85G              | 26.15 | 26.85 |
| A85T              | 26.08 | 27.11 |
| A85S              | 26.04 | 27.11 |
| A85M              | 26.31 | 27.13 |
| A85Hid            | 26.49 | 27.41 |
| A85Hip            | 30.10 | 31.04 |
| A85K <sup>†</sup> | 30.67 | 32.30 |
| A85R              | 31.44 | 32.69 |
| K87E              | 11.72 | 11.94 |
| K87D              | 11.96 | 12.20 |
| K87G              | 12.61 | 12.74 |
| K87A              | 12.70 | 12.83 |
| K87Q              | 12.74 | 12.99 |
| K87S              | 12.61 | 13.07 |
| K87C              | 12.86 | 13.08 |
| K87M              | 12.80 | 13.11 |
| K87W              | 12.88 | 13.14 |
| K87V              | 12.98 | 13.15 |
| K87N              | 12.96 | 13.21 |
| K87I              | 13.00 | 13.23 |
| K87T              | 12.82 | 13.29 |
| K87L              | 13.24 | 13.55 |
| K87Hid            | 13.28 | 13.57 |
| K87Hie            | 13.33 | 13.59 |
| K87R              | 13.55 | 14.11 |
| K87*              | 13.42 | 14.14 |

|                   |        |        |
|-------------------|--------|--------|
| K87F              | 13.99  | 14.15  |
| K87Y <sup>†</sup> | 14.06  | 14.24  |
| K87Hip            | 13.90  | 14.25  |
| V88E              | 11.67  | 11.85  |
| V88L              | 12.14  | 12.42  |
| V88D              | 13.16  | 13.26  |
| V88G              | 14.09  | 14.20  |
| V88Q              | 14.76  | 14.92  |
| V88A              | 14.98  | 15.09  |
| V88S              | 15.02  | 15.18  |
| V88M              | 15.32  | 15.59  |
| V88C              | 15.61  | 15.73  |
| V88I              | 15.68  | 15.84  |
| V88N              | 15.81  | 15.99  |
| V88T              | 15.93  | 16.07  |
| V88*              | 16.46  | 16.61  |
| V88Hid            | 16.65  | 16.81  |
| V88K              | 16.56  | 16.94  |
| V88Hie            | 16.83  | 16.96  |
| V88Y <sup>†</sup> | 17.34  | 17.55  |
| V88Hip            | 17.65  | 17.83  |
| V88R              | 17.52  | 17.95  |
| V88F <sup>†</sup> | 17.99  | 18.15  |
| V88W              | 18.55  | 18.71  |
| R89Y              | -26.90 | -26.05 |
| R89F              | -23.87 | -22.50 |
| R89L              | 10.43  | 11.19  |
| R89D              | 11.43  | 11.88  |
| R89E              | 12.74  | 13.18  |
| R89V              | 13.77  | 14.23  |
| R89Hid            | 13.61  | 14.40  |
| R89G              | 14.22  | 14.46  |
| R89A              | 14.52  | 14.78  |
| R89T              | 13.94  | 14.81  |
| R89S              | 14.53  | 15.00  |
| R89N              | 14.66  | 15.14  |
| R89C              | 15.00  | 15.27  |
| R89Hie            | 14.66  | 15.37  |
| R89I              | 15.20  | 15.57  |
| R89Q              | 16.05  | 16.50  |
| R89Hip            | 16.00  | 16.66  |
| R89M              | 16.63  | 17.07  |

|      |       |       |
|------|-------|-------|
| R89K | 18.77 | 19.44 |
| R89* | 22.24 | 22.67 |



## References

- [1] A. A. Ojewole, J. D. Jou, V. G. Fowler, and B. R. Donald. *BBK\** (branch and bound over  $K^*$ ): a provable and efficient ensemble-based algorithm to optimize stability and binding affinity over large sequence spaces. In Springer International Publishing, 2017, pages 157–172.
