# Supplementary material for: Novel, provable algorithms for efficient ensemble-based computational protein design and their application to the redesign of the c-Raf-RBD:KRas protein-protein interface
Source: PubMed Central journal article supplement (PMC7329130; doi:10.1371/journal.pcbi.1007447), 2020-06-08
Supplement: pcbi.1007447.s009.pdf [file pcbi.1007447.s009.pdf]

**Novel, provable algorithms for efficient ensemble-based computational protein design and their application to the redesign of the c-Raf-RBD:KRas protein-protein interface (Supporting information)**

Anna U. Lowegard<sup>†</sup>, Marcel S. Frenkel<sup>†</sup>, Graham T. Holt, Jonathan D. Jou, Adegoke A. Ojewole, and Bruce R. Donald

<sup>†</sup> These authors contributed equally to the work.

**S4 Table.  $K_d$  values for each tested variant for all replicates of BLI titration experiments.**

For each listed variant, we give the dissociation constant  $K_d$  for each BLI titration experiment calculated from the fit done using the built-in mass transport model within the Octet Data Analysis HT software provided by FortéBio. We only accepted fits with a sum of square deviations  $\chi^2$  less than 1 (FortéBio recommends a value less than 3) and a coefficient of determination  $R^2$  greater than 0.98. Presented in the table in Fig 10 are averages of these  $K_d$  values.

| Run | Variant        | $K_d$ (M)             | $\chi^2$ | $R^2$  |
|-----|----------------|-----------------------|----------|--------|
| 1   | c-Raf-RBD(RKY) | $4.83 \times 10^{-9}$ | 0.0462   | 0.9997 |
| 2   | c-Raf-RBD(RKY) | $4.01 \times 10^{-9}$ | 0.0529   | 0.9997 |
| 3   | c-Raf-RBD(RKY) | $2.04 \times 10^{-9}$ | 0.211    | 0.9947 |
| 4   | c-Raf-RBD(RKY) | $2.15 \times 10^{-9}$ | 0.6266   | 0.997  |
| 1   | c-Raf-RBD(RK)  | $1.47 \times 10^{-8}$ | 0.2232   | 0.9972 |
| 2   | c-Raf-RBD(RK)  | $1.59 \times 10^{-8}$ | 0.2303   | 0.9975 |
| 3   | c-Raf-RBD(RK)  | $1.58 \times 10^{-8}$ | 0.2269   | 0.9895 |
| 1   | A85K           | $5.18 \times 10^{-8}$ | 0.3814   | 0.9957 |
| 2   | A85K           | $4.53 \times 10^{-8}$ | 0.1414   | 0.9885 |
| 1   | V88Y           | $3.86 \times 10^{-8}$ | 0.7742   | 0.9914 |
| 2   | V88Y           | $2.59 \times 10^{-8}$ | 0.1658   | 0.9898 |
| 1   | Wild-Type      | $1.31 \times 10^{-7}$ | 0.0971   | 0.9938 |
| 2   | Wild-Type      | $1.01 \times 10^{-7}$ | 0.2561   | 0.9917 |
| 3   | Wild-Type      | $1.17 \times 10^{-7}$ | 0.4417   | 0.9856 |
